# Supplementary material for: Investigating frank autism: clinician initial impressions and autism characteristics
Source: PubMed Central journal article supplement — Mol Autism. 2024 Nov 13;15:48. doi: 10.1186/s13229-024-00627-z (PMC11562855; doi:10.1186/s13229-024-00627-z), 2024-11-13
Supplement: 13229_2024_627_MOESM1_ESM.pdf [file 13229_2024_627_MOESM1_ESM.pdf]

**Coding manual: ALTOS 5-minute diagnostic impression form (Thomas, R., Canale, R., Larson, C., 2021)**

|                                                                                         |                                                                                                                                |                                                                                                                                                                                                                                     |                                                                                                                                                                                                                                                                           |
|-----------------------------------------------------------------------------------------|--------------------------------------------------------------------------------------------------------------------------------|-------------------------------------------------------------------------------------------------------------------------------------------------------------------------------------------------------------------------------------|---------------------------------------------------------------------------------------------------------------------------------------------------------------------------------------------------------------------------------------------------------------------------|
| <b>Pt. ID number:</b>                                                                   | <input type="checkbox"/> Telehealth<br><input type="checkbox"/> In-person                                                      | PT wearing mask?<br><input type="checkbox"/> Yes<br><input type="checkbox"/> No                                                                                                                                                     | Setting used for impression (check all that apply)?<br><input type="checkbox"/> Video call<br><input type="checkbox"/> Waiting room<br><input type="checkbox"/> Walk to eval room<br><input type="checkbox"/> Structured activity<br><input type="checkbox"/> Other _____ |
| Clinician name:                                                                         |                                                                                                                                |                                                                                                                                                                                                                                     |                                                                                                                                                                                                                                                                           |
| 5 min Dx impression<br><input type="checkbox"/> ASD<br><input type="checkbox"/> Non-ASD | Did you have access to information before completing this form?<br><input type="checkbox"/> Yes<br><input type="checkbox"/> No | Type of information accessed before completing this form<br><input type="checkbox"/> Reviewed records<br><input type="checkbox"/> Spoke with parent<br><input type="checkbox"/> PT self-disclosed<br><input type="checkbox"/> Other | Confidence in 5-min impression<br><input type="checkbox"/> 1: Not very confident<br><input type="checkbox"/> 2<br><input type="checkbox"/> 3: Confident<br><input type="checkbox"/> 4<br><input type="checkbox"/> 5: Extremely confident                                  |

*Complete form after first 5 minutes with Pt: 1) Indicate what information contributed to your initial Dx impression (left column) and 2) your confidence (+ -- confident) in the scoring of that component of your impression (right column). Please note behavioral observations that contributed to your impression.*

|                                                                                              |   |    |
|----------------------------------------------------------------------------------------------|---|----|
| Gesture:                                                                                     | + | -- |
| <input type="checkbox"/> 2- No use of age/context appropriate gestures                       |   |    |
| <input type="checkbox"/> 1- Some use of age/context-appropriate gestures                     |   |    |
| <input type="checkbox"/> 0- Normal use of age/context-appropriate of gestures                |   |    |
| Eye contact:                                                                                 | + | -- |
| <input type="checkbox"/> 2- Abnormal quality or amount based on context                      |   |    |
| <input type="checkbox"/> 1- Somewhat abnormal quality or amount based on context             |   |    |
| <input type="checkbox"/> 0- Normal quality and amount based on context                       |   |    |
| Motor mannerisms:                                                                            | + | -- |
| <input type="checkbox"/> 2- Frequent use of atypical mannerisms                              |   |    |
| <input type="checkbox"/> 1- Some use of atypical mannerisms                                  |   |    |
| <input type="checkbox"/> 0- No use of atypical mannerisms                                    |   |    |
| Prosody and vocalizations:                                                                   | + | -- |
| <input type="checkbox"/> 2- Frequent use of unusual vocal prosody and/or repetitive language |   |    |
| <input type="checkbox"/> 1- Some use of unusual vocal prosody and/or repetitive language     |   |    |
| <input type="checkbox"/> 0- No use of unusual vocal prosody and/or repetitive language       |   |    |
| Facial expressions:                                                                          | + | -- |
| <input type="checkbox"/> 2- Mostly abnormal for context                                      |   |    |
| <input type="checkbox"/> 1- Sometimes abnormal for context                                   |   |    |
| <input type="checkbox"/> 0- Normal for context                                               |   |    |
| Focus/shifting of attention (including perseverative thinking and distractibility):          | + | -- |
| <input type="checkbox"/> 2- Difficulty focusing or shifting attention                        |   |    |
| <input type="checkbox"/> 1- Some difficulty focusing or shifting attention                   |   |    |
| <input type="checkbox"/> 0- No difficulty focusing and shifting attention                    |   |    |
| Social reciprocity (responses):                                                              | + | -- |
| <input type="checkbox"/> 2- Impaired                                                         |   |    |
| <input type="checkbox"/> 1- Somewhat impaired                                                |   |    |
| <input type="checkbox"/> 0- Normal                                                           |   |    |
| Interactions with others (initiations):                                                      | + | -- |
| <input type="checkbox"/> 2- Impaired                                                         |   |    |
| <input type="checkbox"/> 1- Somewhat impaired                                                |   |    |
| <input type="checkbox"/> 0- Normal                                                           |   |    |
| Other                                                                                        | + | -- |
| <input type="checkbox"/> _____                                                               |   |    |

**COMPLETE AFTER FINISHING APPT**

Confidence in final diagnosis

- 1 (Not very confident) 2 3 (Confident) 4 5 (Extremely confident)
